# Supplementary material
Source: MDPI journal article supplement (https://www.mdpi.com/2297-8739/8/12/238)

## Supporting Information

### **A Method to Separate Two Main Antioxidants from *Lepidium latifolium* L. Extracts Using Online Medium Pressure Chromatography Tower and Two-Dimensional Inversion/Hydrophobic Interaction Chromatography Based on Online HPLC-DPPH Assay**

Xiu Wang<sup>a,b</sup>, Yupei Zhang<sup>a,b</sup>, Nan Wu<sup>a,b</sup>, Jingya Cao<sup>a,b</sup>, Yanduo Tao<sup>a</sup>, Ruitao Yu<sup>a\*</sup>

<sup>a</sup>Key Laboratory of Tibetan Medicine Research, Northwest Institute of Plateau Biology, Chinese Academy of Sciences, Xining, Qinghai, China

<sup>b</sup>University of Chinese Academy of Science, Beijing, China

---

**\*Corresponding authors at:** Key Laboratory of Tibetan Medicine Research, Northwest Institute of Plateau Biology, Chinese Academy of Sciences, No. 23 Xinning Road, Xining, China.

**Tel:** 13897406734

**E-mail:** yuruitao521@163.com.

**Figure S1. ESI mass spectrum of Fr4-1-1**

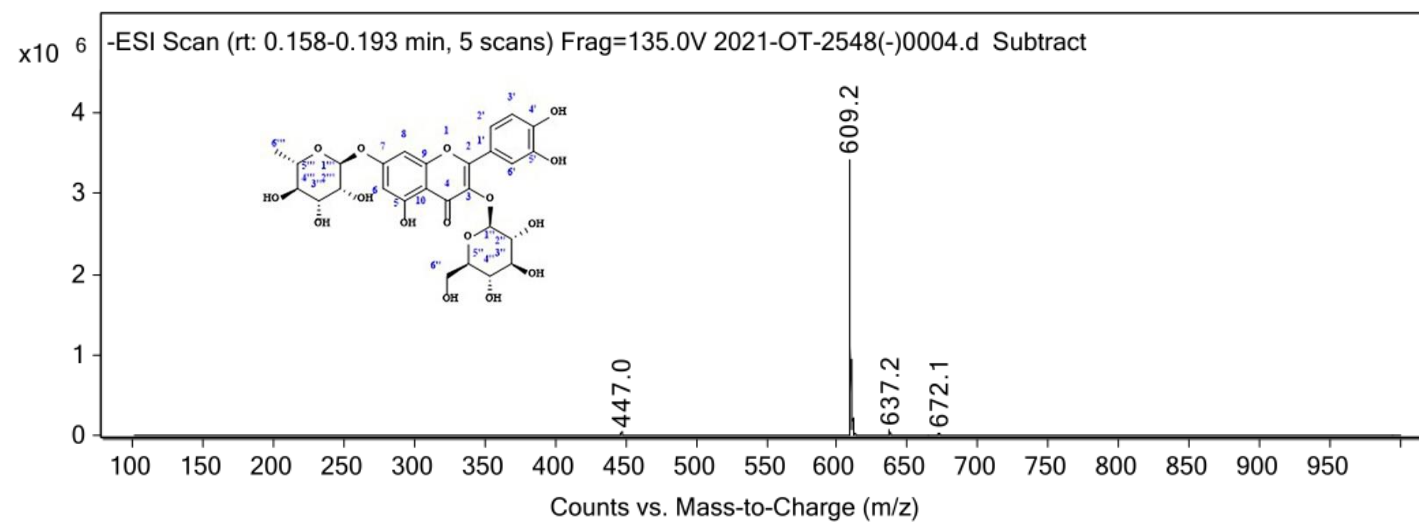

Figure S2.  $^1\text{H}$  NMR Spectrum (600 MHz) of Fr4-1-1 (in MeOD- $d_4$ )

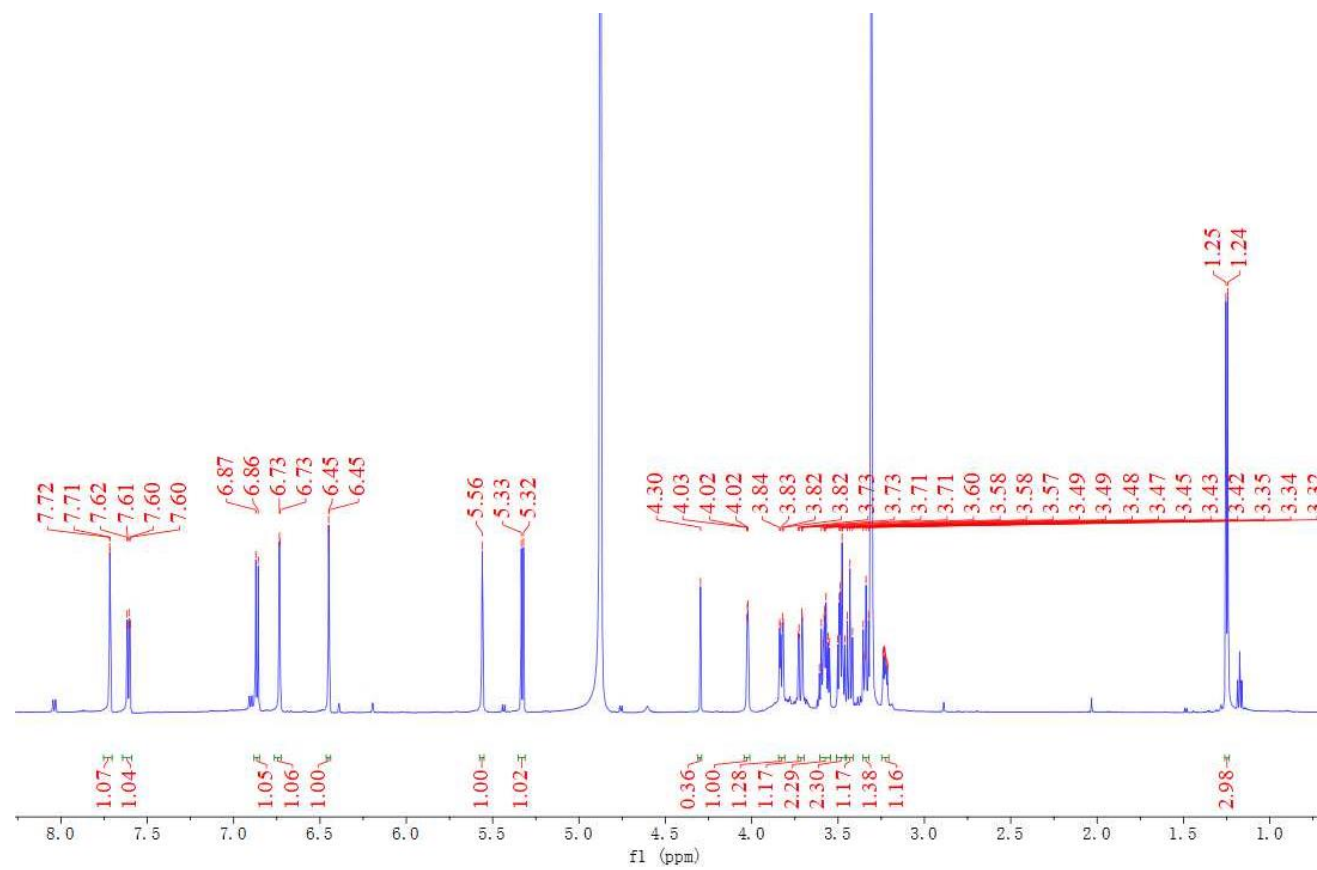

Figure S3.  $^{13}\text{C}$  NMR Spectrum (600 MHz) of Fr4-1-1 (in  $\text{MeOD-}d_4$ )

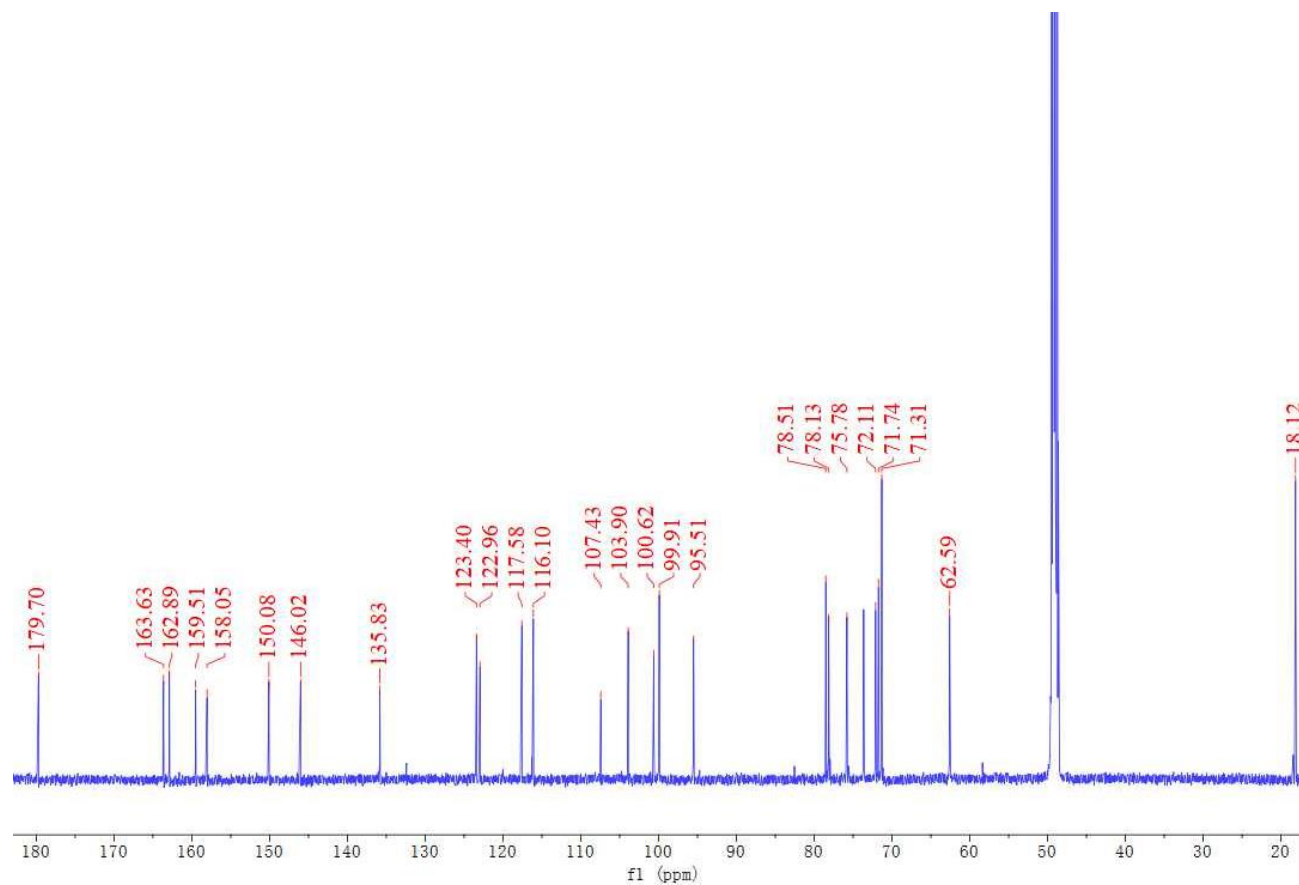

**Figure S4. HMBC Spectrum (600 MHz) of Fr4-1-1 (in MeOD-*d*<sub>4</sub>)**

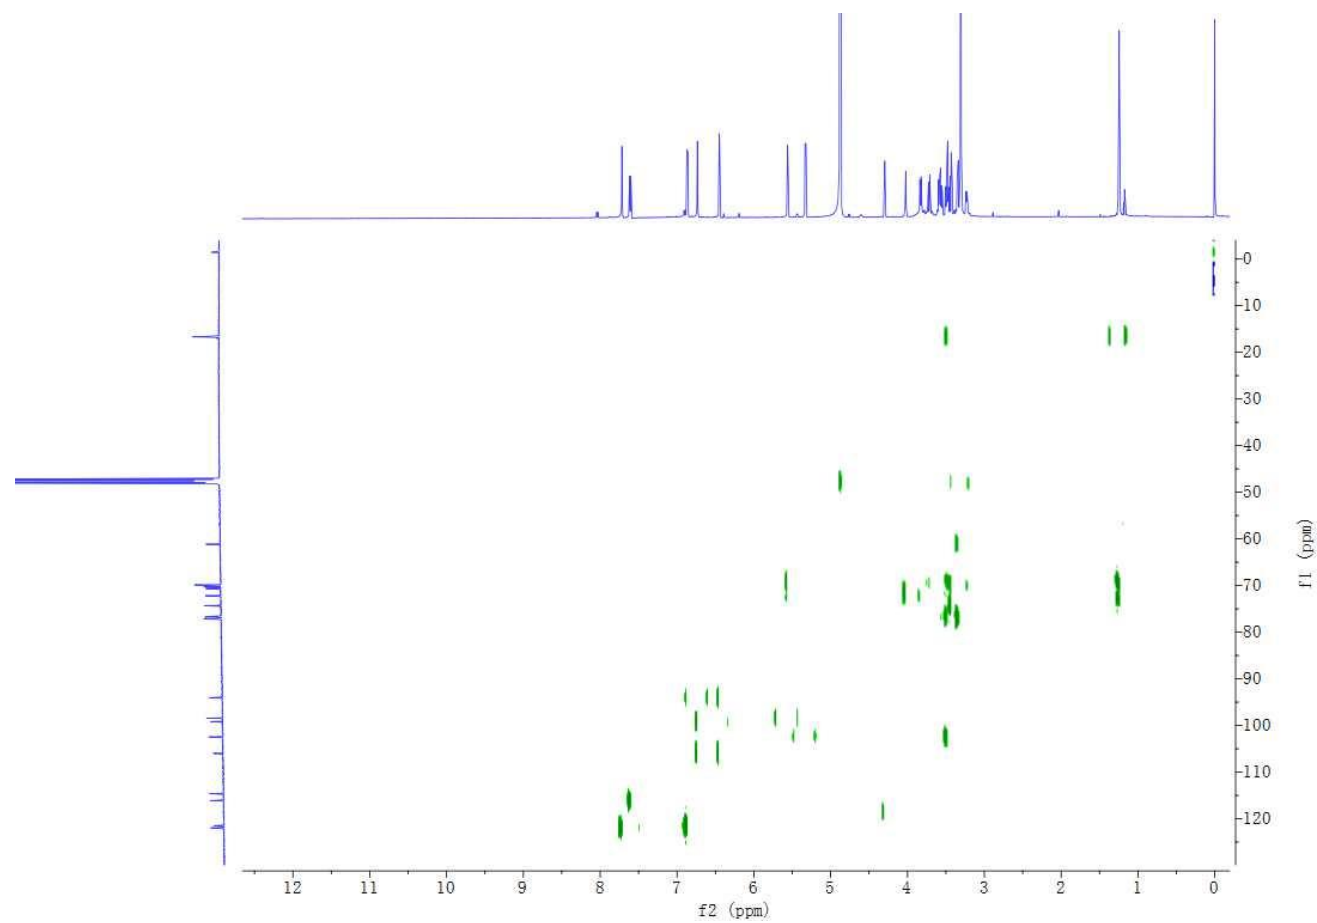

Figure S5. ESI mass spectrum of Fr4-1-2

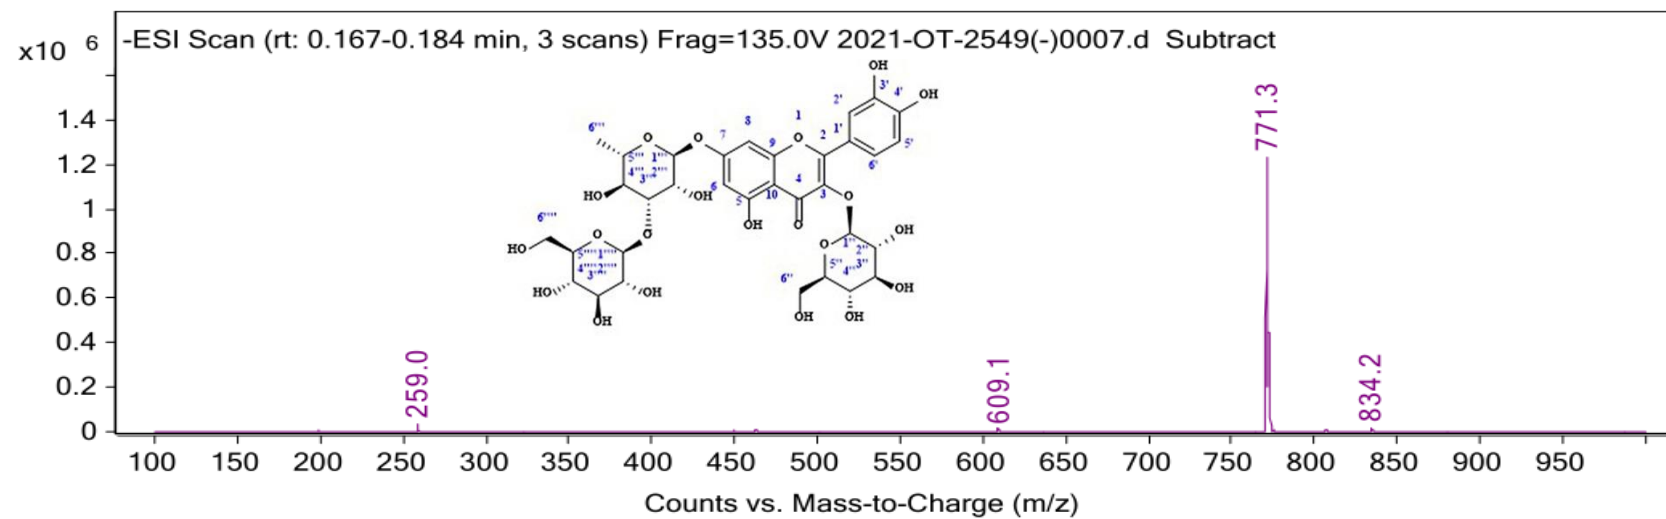

Figure S6.  $^1\text{H}$  NMR Spectrum (600 MHz) of Fr4-1-2 (in  $\text{MeOD-}d_4$ )

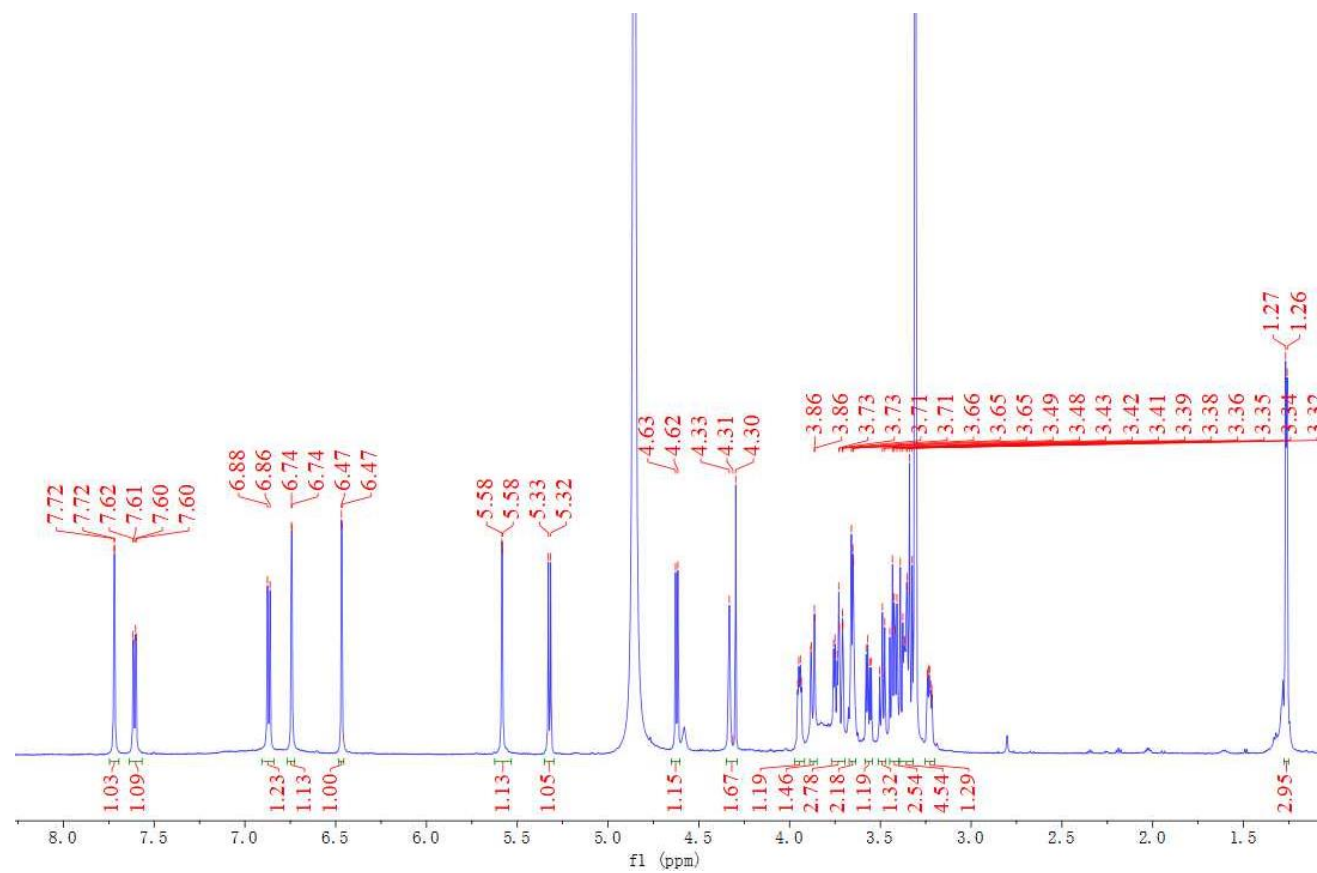

Figure S7.  $^{13}\text{C}$  NMR Spectrum (600 MHz) of Fr4-1-2 (in  $\text{MeOD-}d_4$ )

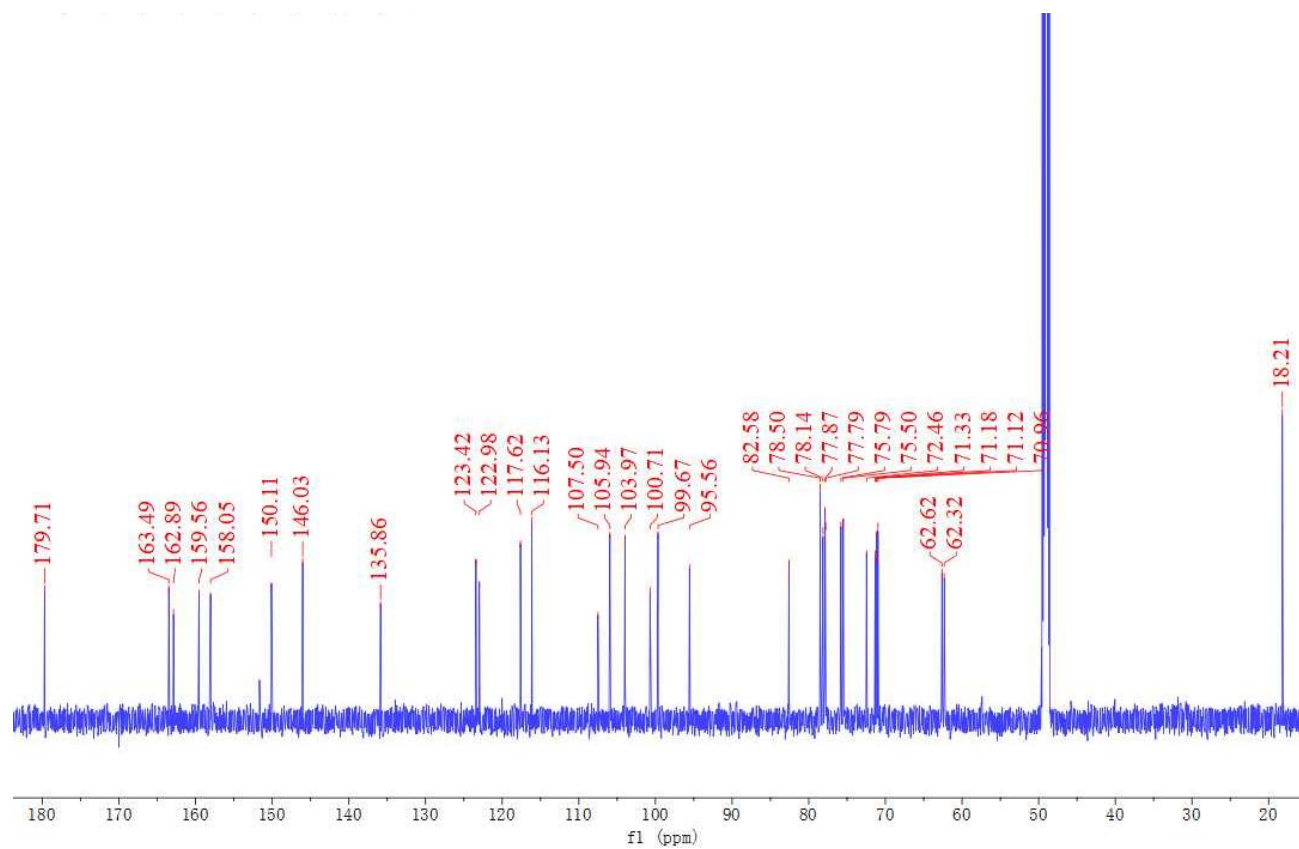



**Figure S8. HMBC Spectrum (600 MHz) of Fr4-1-2 (in MeOD-*d*<sub>4</sub>)**

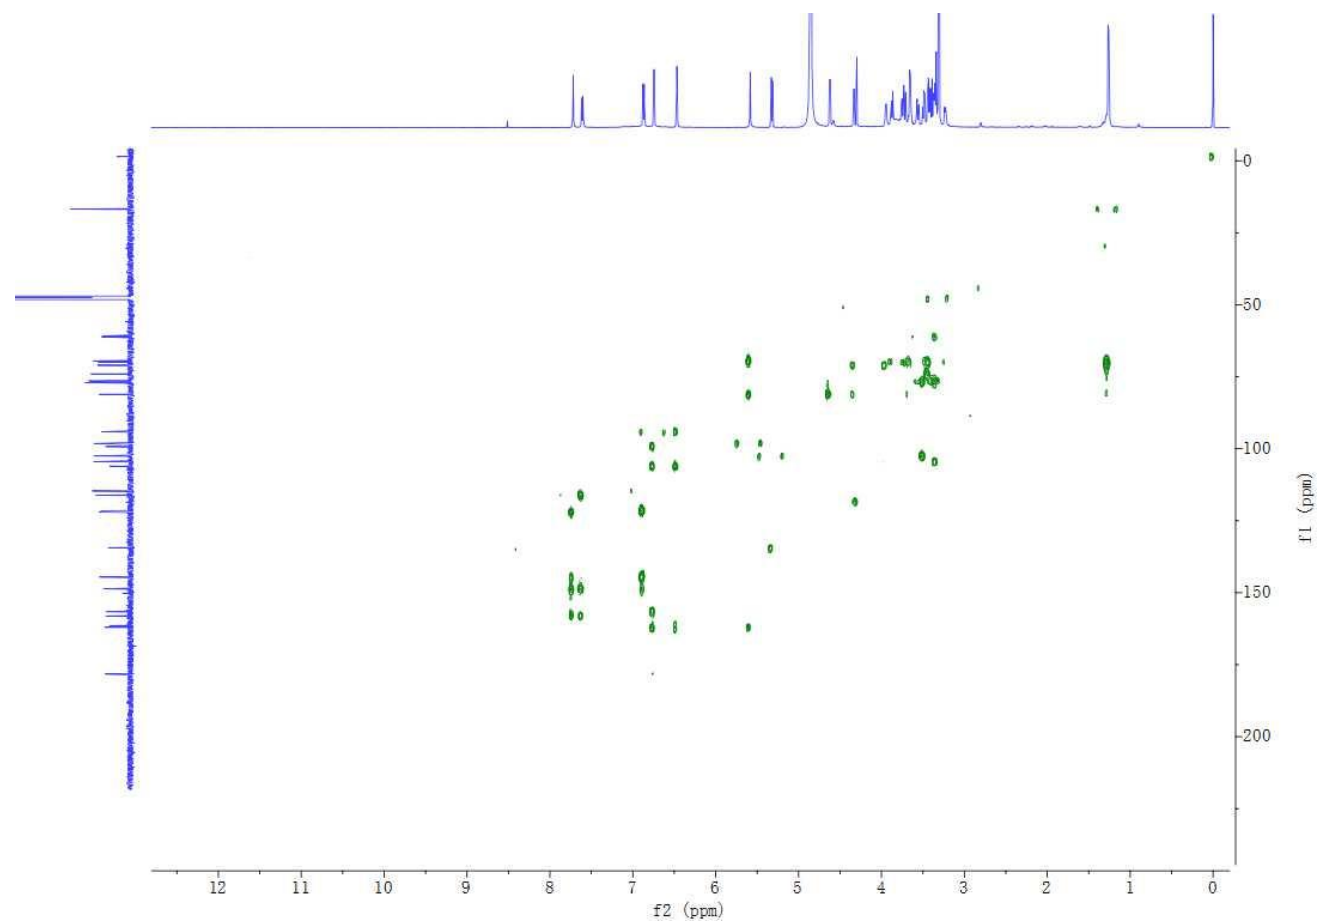

Supplement: s1 [file s1]
